# Supplementary material for: Cancer incidence in World Trade Center-exposed and non-exposed male firefighters, as compared with the US adult male population: 2001–2016
Source: PubMed Central journal article supplement — Occup Environ Med. 2021 Sep 10;78(10):707–14. doi: 10.1136/oemed-2021-107570 (PMC8458058; doi:10.1136/oemed-2021-107570), 2021-09-10
Supplement: oemed-2021-107570supp001.pdf [file oemed-2021-107570supp001.pdf]

## Data Supplement

**Cancer Incidence in World Trade Center-Exposed and Non-Exposed Male Firefighters, as Compared with the US Adult Male Population: 2001 - 2016**

Mayris P. Webber, DrPH, Ankura Singh, MPH, Rachel Zeig-Owens, DrPH, Joke Salako, MPH, Molly Skerker, MPH, Charles B. Hall, PhD, David G. Goldfarb, MPH, Nadia Jaber, RPA-C, Robert D. Daniels, PhD, David J. Prezant, MD

**Table S1: Characteristics of excluded Fire Department of the City of New York (FDNY) World Trade Center (WTC)-exposed and Career Firefighter Health Study (CFHS) female firefighters**

|                                                         | WTC-exposed female FDNY firefighters active on 9/11 | Female CFHS firefighters actively employed on 9/11 |
|---------------------------------------------------------|-----------------------------------------------------|----------------------------------------------------|
| <b>Total N</b>                                          | 28                                                  | 585                                                |
| <b>Age on 9/11, mean <math>\pm</math> SD</b>            | 42.0 $\pm$ 6.9                                      | 37.8 $\pm$ 7.0                                     |
| <b>Race/ethnicity, N (%)</b>                            |                                                     |                                                    |
| White                                                   | 20 (71.4)                                           | 362 (61.9)                                         |
| Black                                                   | 6 (21.4)                                            | 116 (19.8)                                         |
| Hispanic                                                | 2 (7.1)                                             | 52 (8.9)                                           |
| Other <sup>a</sup>                                      | 0                                                   | 55 (9.4)                                           |
| <b>Smoking status, N (%)</b>                            |                                                     |                                                    |
| Current                                                 | 1 (3.6)                                             | 14 (7.3) <sup>b</sup>                              |
| Former                                                  | 12 (42.9)                                           | 54 (28.0) <sup>b</sup>                             |
| Never                                                   | 15 (53.6)                                           | 125 (64.8) <sup>b</sup>                            |
| <b>Alive at end of study period (31/12/2016), N (%)</b> | 25 (89.3)                                           | 572 (97.8)                                         |

<sup>a</sup>Includes Asian and Native American race categories; <sup>b</sup>N=193 who completed CFHS survey
